# 1 MICOM: metagenome-scale modeling to infer metabolic 2 interactions in the gut microbiota.

3

4 Christian Diener<sup>1,2</sup>, Sean M. Gibbons<sup>2,3,\*</sup> and Osbaldo Resendis-Antonio<sup>1,4,\*</sup>.

5

6 <sup>1</sup> Instituto Nacional de Medicina Genómica (INMEGEN), Mexico City 14610, México

7 <sup>2</sup> Institute for Systems Biology, Seattle, WA, USA

8 <sup>3</sup> eScience Institute, University of Washington, Seattle, WA, USA

9 <sup>4</sup> Human Systems Biology Laboratory. Coordinación de la Investigación Científica - Red de  
10 Apoyo a la Investigación, UNAM.

11

12 \* Corresponding authors: [oresendis@inmegen.gob.mx](mailto:oresendis@inmegen.gob.mx), [sgibbons@isbscience.org](mailto:sgibbons@isbscience.org)

## 13 Abstract

14 Compositional changes in the gut microbiota have been associated with a variety of medical  
15 conditions such as obesity, Crohn's disease and diabetes. However, connecting microbial  
16 community composition to ecosystem function remains a challenge. Here, we introduce MICOM  
17 - a customizable metabolic model of the human gut microbiome. By using a heuristic optimization  
18 approach based on L2 regularization we were able to obtain a unique set of realistic growth rates  
19 that corresponded well with observed replication rates. We integrated adjustable dietary and  
20 taxon abundance constraints to generate personalized metabolic models for individual  
21 metagenomic samples. We applied MICOM to a balanced cohort of metagenomes from 186  
22 people, including a metabolically healthy population and individuals with type 1 and type 2  
23 diabetes. Model results showed that individual bacterial genera maintained conserved niche  
24 structures across humans, while the community-level production of short chain fatty acids  
25 (SCFAs) was heterogeneous and highly individual-specific. Model output revealed complex  
26 cross-feeding interactions that would be difficult to measure *in vivo*. Metabolic interaction  
27 networks differed somewhat consistently between healthy and diabetic subjects. In particular  
28 MICOM predicted reduced butyrate and propionate production in a diabetic cohort, with  
29 restoration of SCFA production profiles found in healthy subjects following metformin treatment.  
30 Overall, we found that changes in diet or taxon abundances have highly personalized effects. We  
31 believe MICOM can serve as a useful tool for generating mechanistic hypotheses for how diet

32 and microbiome composition influence community function. All methods are implemented in the  
33 open source Python package, which is available at <https://github.com/micom-dev/micom>.

## 34 Introduction

35 The composition of the gut microbiome can influence host metabolism (1) and has been  
36 associated with a variety of health conditions such as obesity, Crohn's Disease, diabetes and  
37 colorectal cancer (2–6). However, the causal roles played by the gut microbiota in host physiology  
38 and disease remain unclear. Several studies have mapped individual gut microbial genes to  
39 functions (7–9). However, these mappings are largely qualitative, as the presence of a particular  
40 gene does not guarantee expression of a functional enzyme. An alternative strategy to quantify  
41 the metabolic capacity of a microbial community is to use computational models for inferring fluxes  
42 in biochemical networks (10, 11). While direct experimental measurement of fluxes by carbon or  
43 nitrogen labeling is costly, one can readily estimate the metabolic fluxes of a model organism  
44 using genome-scale metabolic models. For individual bacteria, metabolic modeling using flux  
45 balance analysis (FBA) has been a valuable tool for exploring metabolic capacities under varying  
46 conditions and has been used extensively in basic research, biochemical strain engineering, and  
47 *in vitro* models of bacterial interactions (12–15). In FBA, fluxes are usually approximated from a  
48 genome-scale model containing all known biochemical reactions by maximizing the production of  
49 biomass under constraints mirroring enzymatic, thermodynamic and environmental conditions  
50 (13). For instance, one can restrict metabolic import fluxes to those whose substrates are present  
51 in the growth medium (12, 14, 16) in order to simulate a particular nutrient environment. Extending  
52 FBA to microbial communities is challenging due to the necessity of modeling metabolic  
53 exchanges between many taxa and selecting an appropriate objective function to account for  
54 potential tradeoffs between species and community growth rates.

55 Maximizing the community growth rate is at odds with maximizing individual species  
56 growth rates. Multi-objective methods, like OptCom, attempt to find the joint maximum of  
57 individual and community growth rates (17). However, these multi-objective methods are limited  
58 to smaller-sized communities. The human gut microbiome, on the other hand, may contain up to  
59 several hundred distinct species (18). An additional challenge is the integration of relative  
60 abundances obtained from 16S amplicon or metagenomic shotgun sequencing into a community  
61 FBA model. This is particularly important for accurately inferring the metabolic exchanges taking  
62 place between different species within the community. A very abundant species should import  
63 and export much greater absolute quantities of metabolites than a very rare species, which in turn

64 impacts the resulting community-level biochemical fluxes. Despite the challenges, genome-scale  
65 metabolic modeling of microbial communities holds great promise as a tool for estimating the  
66 metabolic potential of an individual's gut microbiome. In particular, this approach could yield  
67 valuable insights into possible metabolic mechanisms underlying host disease states.

68 Here, we present a computational approach that efficiently extends metabolic modeling to  
69 entire microbial communities. Using a two-step optimization procedure, we were able to simulate  
70 growth and metabolic exchange fluxes for metagenome-scale metabolic models of ecologically  
71 diverse bacterial systems. Additionally, we explicitly included microbial abundances from  
72 metagenomic shotgun sequencing and realistic dietary inputs in order to make quantitative,  
73 personalized, metabolic predictions. This entire strategy is implemented in an open-access  
74 Python software package called "MICOM" (**M**icrobial **COM**munity).

75 We tested our approach by applying MICOM to a balanced data set of 186 Danish and  
76 Swedish individuals, including healthy controls, patients with type 1 diabetes, and patients with  
77 type 2 diabetes with and without metformin treatment. We show that individual bacterial growth  
78 rates vary greatly across samples and are correlated with independently measured replication  
79 rates. We quantified exchanges between the gut microbiota and gut lumen and studied the effect  
80 of the microbiota composition on the production of short chain fatty acids (SCFAs) across samples  
81 from healthy and diabetic individuals. Overall, we found that MICOM predicted a bimodal usage  
82 pattern of dietary metabolites, ecological interactions between microbes tended to be community-  
83 specific and largely competitive, key gut genera associated with health participated in the largest  
84 number of ecological interactions, inferred SCFA production was lower in diabetic patients, and  
85 targeted dietary or probiotic interventions had unique functional consequences for each individual.  
86

## 87 **Results**

88 A regularization strategy for microbial community models.

89  
90 Metabolic modeling is commonly applied to model a single strain of bacteria in log-phase, where  
91 the growth rate is approximately constant and the log of the bacterial abundance increases  
92 linearly with time. Modeling bacterial growth in natural environments is often more complex than  
93 this, but some information on environmental context can be extracted from the relative  
94 abundances of bacterial taxa. Within a single individual, and in the absence of persistent dietary

95 changes, gut microbial relative abundances tend to fluctuate around a fixed median value over  
96 month-to-year timescales (19–21). This is consistent with a steady state model where bacterial  
97 growth is in equilibrium with a dilution process that continuously removes biomass from the  
98 system (22). Under this approximation bacterial growth rates are constants  $\mu_i$  (in 1/h), which is  
99 compatible with the assumption of FBA. All bacteria in the microbial community then contribute to  
100 the production of total biomass, with an overall growth rate constant  $\mu_c$ . The community growth  
101 rate  $\mu_c$  is obtained from the individual growth rates  $\mu_i$  by a weighted mean, with the relative  
102 contribution of species  $i$  ( $a_i$ ) to the total biomass serving as the weight (17, 22).

103

$$104 \quad \mu_c = \sum_i a_i \mu_i \quad (1)$$

105

106 Even though FBA can be used to obtain the maximum community growth rate, one can see from  
107 Equation 1 that there is an infinite combination of different individual growth rates  $\mu_i$  for any given  
108 community growth rate  $\mu_c$  (see Fig. 1A for an example). Various strategies have been employed  
109 in order to deal with this limitation, where the simplest strategy is to report any one of the possible  
110 growth rates distributions for  $\mu_i$ . Other approaches attempt to find the set of growth rates that  
111 maximize community growth and individual growth at the same time (17), but this is  
112 computationally intensive and may not scale well to the species-diverse gut microbiome (18, 23).  
113 Thus, we formulated a strategy that allows us to identify a realistic set of individual growth rates  
114  $\mu_i$  and scales to large communities. The simplest case of a microbial community is a community  
115 composed of two identical clonal strains, each present in the same abundance. Assuming that  
116 the maximum community and individual growth rates are equal to 1.0 there are now many  
117 alternative solutions giving maximal community growth (Fig. 1A). However, the two populations  
118 are identical and present in the same abundance, so one would expect that both grow at the same  
119 rate. In order to enforce a particular distribution of individual growth rates one can try to optimize  
120 an additional function over the individual growth rates  $\mu_i$ . This is known as regularization and a  
121 feasible regularization function should enrich for biologically relevant growth rate distributions. As  
122 a heuristic, our minimal requirement for a feasible regularization function was consistency with  
123 the observed metagenomic abundances. This means that a taxon that is observed in the data  
124 should be able to grow. Thus the growth rate of a taxon should be non-zero if its abundance is  
125 non-zero. We show in Supplemental Text S1 that no linear regularization function can comply  
126 with that requirement whereas a simple quadratic regularization, also known as L2 regularization,  
127 does fulfill that requirement (24, 25). L2 regularization is known to distribute magnitude over all

128 variables, which is also consistent with a maximization of individual growth rates and thus forms  
129 a heuristic for the simultaneous maximization of individual and community growth rates.

130  
131 L2 regularization can be readily integrated into FBA as a quadratic optimization problem, which  
132 is not necessarily true for any generic function. In the previous example of two identical strains  
133 only the L2 norm correctly identifies the solution where both strains grow at the same rate as  
134 optimal. Additionally, the L2 norm has a unique minimum. Thus, there is only one configuration of  
135 individual growth rates  $\mu_i$  that minimizes the L2 norm for a given community growth rate  $\mu_c$ . In  
136 practice, maximal community growth might only be achievable if many taxa are excluded from  
137 growth, for instance by giving all resources to a fast-growing subpopulation. Again, this is  
138 inconsistent with reality if one has prior knowledge that the other taxa are present in the gut and  
139 should be able to grow. Instead of enforcing the maximal community growth rate one can limit  
140 community growth to only a fraction of its maximum rate, thus creating a tradeoff between optimal  
141 community growth and individual growth rate maximization. Community growth maximization  
142 requires full cooperativity, whereas the L2 norm minimization represents selfish individual growth  
143 maximization. Thus we call our two-step strategy of first fixing community growth rate to a fraction  
144 of its optimum and then minimizing the L2 norm of individual growth rates a “cooperative trade-  
145 off”. Even though it is difficult to formulate a closed form solution for this two-step optimization,  
146 one can obtain a solution for the second optimization (minimization of regularization term) when  
147 dropping additional constraints for growth rates (see Supplemental Text S1 for derivation). In that  
148 case, growth rates are given by:

149  
150 
$$\mu_i = \frac{\alpha \mu_c}{a^T a} a_i . \quad (2)$$

151  
152 Thus, optimal growth rates will be approximately correlated with abundance where the slope  
153 depends on the abundance distribution and the maximum community growth rate.

154  
155 We found that computation time generally scaled well with the community size (with most  
156 individual optimizations taking less than 5 minutes) when using interior point methods, which are  
157 known to provide better performance for larger models (26). However, we found that it was difficult  
158 to maintain numerical stability with large community models. None of the tested solvers were able  
159 to converge to optimality when solving the quadratic programming problem posed by the L2 norm  
160 minimization (see Methods). Thus, we used a crossover strategy to identify an optimal solution to  
161 the L2 minimization (see Methods).

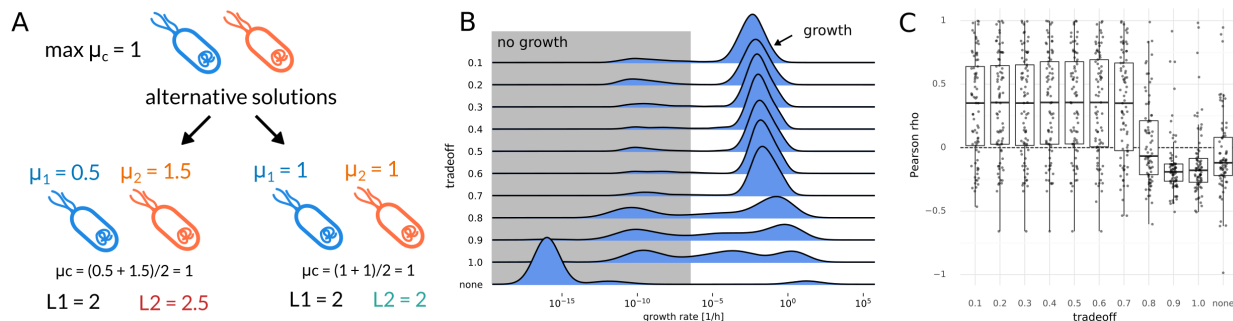

162

163 Figure 1: Regularization of growth rates. (A) Regularization values for a toy model of two identical *E. coli*  
 164 populations. Two alternative solutions are shown with different individual growth rates and respective  
 165 values of regularization optima. Here L1 denotes minimizing the sum of growth rates whereas L2 denotes  
 166 minimization of the sum of squared growth rates. Only L2 regularization favors one over the other and  
 167 identifies the expected solution where both populations grow with the same rate. (B) Effect of different  
 168 trade-off values (fraction of maximum community growth rate) on the distribution of individual genus  
 169 growth rates. Zero growth rates were assigned a value of  $10^{-16}$  which was smaller than the observed non-  
 170 zero minimum. Growth rates smaller than  $10^{-6}$  were considered to not represent growth (shaded area).  
 171 (C) Pearson correlation between replication rates and inferred growth rates under varying trade-off  
 172 values. "None" indicates a model without regularization returning arbitrary alternative solutions (see  
 173 Methods). The dashed line indicates a correlation coefficient of zero.  
 174

## 175 Regularization by cooperative trade-off yields realistic growth rate 176 estimates.

177  
 178 In order to test whether cooperative trade-off yields realistic growth rates, we implemented and  
 179 applied it to a set of 186 metagenome samples from Swedish and Danish individuals (27),  
 180 consisting of healthy individuals, individuals with type 1 diabetes and individuals with type 2  
 181 diabetes stratified by metformin treatment (a known modulator of the gut microbiome) (28).  
 182 Relative abundances and cleaned coverage profiles for a total of 239 bacterial genera and 637  
 183 species were obtained with SLIMM (29) from previously published metagenomic reads (27, 29)  
 184 as described in the Methods section. We used ratios in coverage between replication initiator and  
 185 terminus as a measure for replication rates, which have been reported to be good proxies for  
 186 bacterial growth rates *in vivo* (30). This provided a set of 1571 strain level replication rate  
 187 measurements across the 186 samples that were used for validation of the inferred growth rates  
 188 (1062 and 1113 on genus and species levels respectively, see Methods). Abundance profiles for

189 all identified genera across all samples were connected with the AGORA models, a set of  
190 manually curated metabolic models which currently comprises 818 bacterial species (31). 93 gut-  
191 associated genera within the AGORA reconstructions represented more than 96% of  
192 metagenomic reads across the 186 samples (91% vs 94%, see Table 1 “genus” row). Even  
193 though the cooperative tradeoff strategy is applicable to species or even strain-level data, the  
194 AGORA reconstructions accounted for only 52% of all bacterial species in the data set. Thus, we  
195 decided to perform community model construction separately on species level as well as the  
196 genus level, which covered a larger fraction of the observed microbiome. To accomplish this,  
197 individual strain models from AGORA were pooled into the higher phylogenetic ranks (see  
198 Methods). After removing low abundance taxa (<0.1% for genera and <0.01% for species), the  
199 resulting communities contained between 12 and 30 taxa at the genus level and between 23 and  
200 81 taxa at the species level. Each taxon was represented by a full genome-scale metabolic model  
201 and connected by exchange reactions with the gut lumen, thus yielding two sets of 186 complete  
202 metagenome-scale metabolic models (one set for the species level and one for the genus level).  
203 We used the relative read abundances as a proxy for the relative biomass of each taxa in each  
204 sample (see Methods). Even though relative abundances from shotgun metagenomes are not an  
205 exact representation of bacterial mass (in grams dry weight), we argue that the discrepancy  
206 between the two is probably much smaller than the variation in taxon abundances, which spans  
207 several orders of magnitude (18).  
208

| <b>taxa</b>    | <b>unique taxa</b> | <b>assigned reads</b> | <b>with model</b> |
|----------------|--------------------|-----------------------|-------------------|
| <b>kingdom</b> | 1                  | 100% ± 0%             | 100% ± 0%         |
| <b>phylum</b>  | 22                 | 100% ± 0%             | 99% ± 0%          |
| <b>class</b>   | 32                 | 100% ± 0%             | 99% ± 0%          |
| <b>family</b>  | 102                | 100% ± 0%             | 91% ± 0%          |
| <b>genus</b>   | 239                | 94% ± 5%              | 91% ± 5%          |
| <b>species</b> | 637                | 79% ± 9%              | 52% ± 9%          |

209 Table 1: Distribution of taxa assignments across ranks. Only reads classified as bacteria were considered.  
210 Shown are the number of unique taxa for each rank together with the percentage of mapped reads that  
211 could be uniquely assigned to taxa within the rank, as well as the percentage of reads whose taxa had at



212 least one representative in the AGORA genome-scale metabolic models. Percentages are shown as mean  
213  $\pm$  standard deviation across the 186 samples.

214

215 The data on 186 individuals used in this analysis did not include diet, metabolomics, or data on  
216 total microbial load. Thus, we were limited to study metabolic effects that are driven by microbiota  
217 composition alone and not by additional factors such as diet or total bacterial biomass. To use a  
218 moderately realistic set of import constraints for the community models, we modeled all individuals  
219 as consuming an average Western diet (32). Import fluxes for external metabolites were based  
220 on a reported set of fluxes for an average Western diet (31, 33). To account for uptake in the  
221 small intestine, we reduced all import fluxes for metabolites commonly absorbed in the small  
222 intestine by a factor of 10.

223

224 To evaluate the performance of the cooperative tradeoff we compared the inferred growth rates  
225 with the replication rates obtained directly from sequencing data. First, to establish a baseline we  
226 ran an optimization that only maximized the community growth rate and used the distribution of  
227 growth rates returned by the solver when applying no regularization. This was followed by  
228 applying the cooperative trade-off strategy with varying levels of suboptimality ranging from 10%  
229 to 100% of the maximum community growth rate. As stated above, we observed that simply  
230 optimizing the community growth rate with no regularization of the individual growth rates led to  
231 solutions where only a few taxa grew with unreasonably high growth rates (doubling times shorter  
232 than 5 minutes), whereas the rest of the microbial community had growth rates near zero  
233 (compare Fig. 1B with strategy marked by “none”). Consequently, the resulting model growth  
234 rates were uncorrelated with replication rates (mean Pearson  $\rho = -0.02$ ). Adding the L2 norm  
235 minimization while maintaining maximum community growth allowed more genera to grow (see  
236 Fig. S1) but yielded growth rates that were anticorrelated with replication rates (mean  $r = -0.11$ ).

237 Lowering the community growth rate to suboptimal levels strongly increased the growing fraction  
238 of the population (Fig. S1) and led to a much better agreement with replication rates for tradeoff  
239 values smaller than 70% (mean Pearson  $\rho \cong 0.4$ ). Calculating correlations across all samples  
240 rather than within samples showed a similar tendency, with no regularization showing no  
241 correlation with replication rates ( $r = -0.05$ ,  $p = 0.07$ ) and increased agreement up to a tradeoff of



242 50% ( $r = 0.21$ ,  $p = 2e-12$ ). The lower magnitude correlations in the across samples setting is likely  
243 due to differences in diet or bacterial load across people that were not taken into account. Overall,  
244 the best agreement with the observed replication rates across and within samples was observed  
245 at 50% sub-optimal community growth. We observed similar performance with the species level  
246 models (Fig. S2). However, the best agreement with in vivo replication rates was observed for a  
247 tradeoff parameter of 0.7 (Fig. S2C). Because genus level model performed equally well as  
248 species level models but represented a higher percentage of observed reads (compare Table 1)  
249 we decided to continue all further analysis with the genus models and a tradeoff parameter of 0.5.  
250

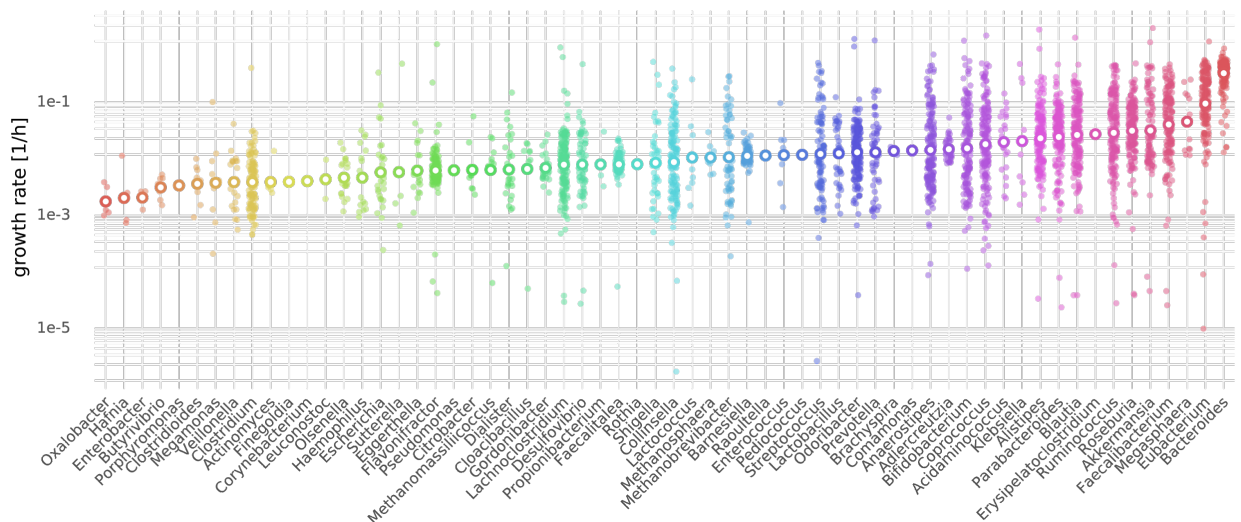

251  
252 Figure 2: Non-zero growth rates ( $> 10^{-6}$ ) across genera obtained by cooperative trade-off (50% maximum  
253 community growth rate). Each small filled point denotes a growth rate in one of the 186 samples and  
254 larger points with white fill denote the mean growth rate for the genus (see Methods). Genera are sorted  
255 by mean growth rate from left (lowest) to right (largest).

256  
257

258 Growth rates are heterogeneous and depend on the community  
 259 composition

260  
 261 A tradeoff of 50% maximal community growth led to good agreement with replication rates.  
 262 Bacterial communities showed an average doubling time of about 6 hours, where individual  
 263 genera had an average doubling time of 11 hours. Community growth did not vary substantially  
 264 across samples ( $0.246 \pm 0.002$  1/h) indicating that each individuals' microbiota were almost  
 265 equally efficient at converting dietary metabolites into biomass at the community level. However,  
 266 we found that individual genus-level growth rates often varied over five orders of magnitude (Fig.  
 267 2). *Bacteroides* was predicted to be the fastest growing genus overall and was closely followed  
 268 by *Eubacterium*, which is consistent with the ubiquitous presence of these abundant taxa in  
 269 microbiome samples (34, 35).

270

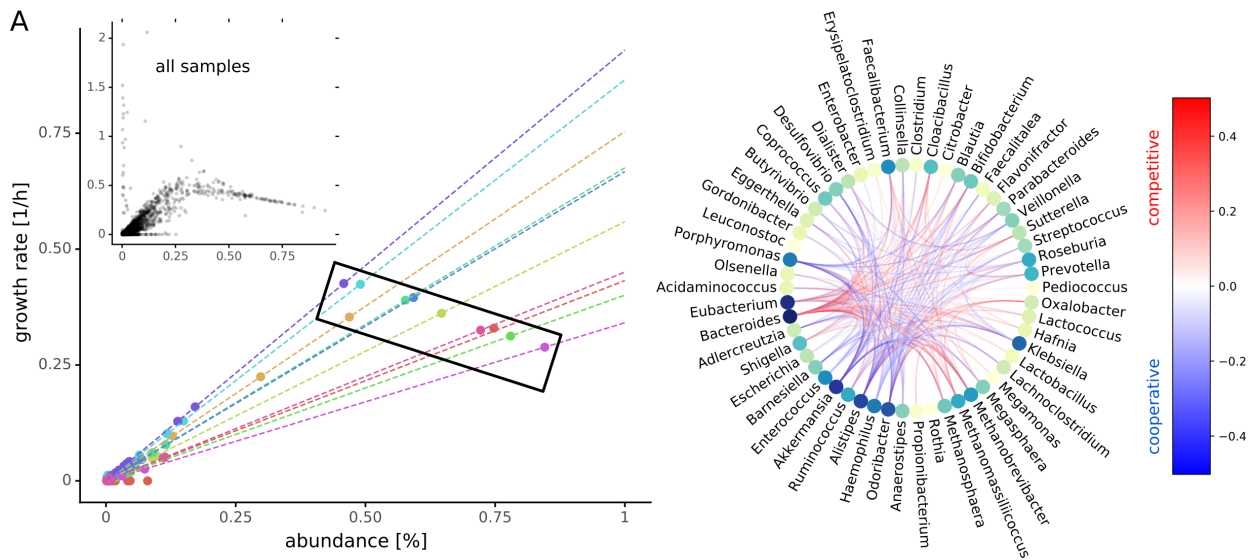

271  
 272 Figure 3: Co-dependencies of growth rates. (A) Relationship between abundance and growth rate across  
 273 samples. Shown in the larger scatter plot are growth rates and abundances for the first 10 samples. Each  
 274 dot denotes one genus in one sample and is colored by sample provenance. Dashed lines denote the linear  
 275 relationship between growth rates and abundances predicted by Equation 2 for each sample. The black  
 276 box demonstrates how varying slopes (i.e. as community evenness declines, so does the within-sample  
 277 slope) can result in negative correlation between abundance and growth rate across samples. Smaller inset  
 278 scatter plot shows data from all samples (Pearson rho=0.69, n=39,815). (B) Growth rate interactions  
 279 between genera as estimated by genus knockouts. Shown are only interaction that induce a mean growth  
 280 rate change of 0.1 across all samples (i.e. ubiquitous interactions). Color of edges indicates change of  
 281 growth rate and type of interaction. Red edges denote competition where removal of one genus increases

282 the growth rate of the other and blue edges denote cooperation or syntropy where the removal of one genus  
283 lowers the growth rate of the other. Nodes are colored by the degree (number of total connections) from  
284 lime (few) to dark blue (many).

285  
286

287 In the absence of additional constraints, L2 regularization will result in growth rates that are  
288 linearly dependent on the taxa abundances (see Equation 2 and Supplemental Text S1).  
289 However, this requires some simplifying assumptions that may not be met in the particular  
290 constraints of the full metabolic community models. We compared growth rates estimates  
291 obtained from numerical optimization with the approximation from Equation 2. We found that  
292 growth rates obtained with the cooperative tradeoff usually followed the derived linear  
293 relationship, albeit with a large variation (mean  $R^2 = 0.94$ ,  $sd = 0.34$ , Fig. 3A). Deviations from  
294 that relationship were mostly observed for small growth rates (see Fig. 3A) which could not reach  
295 the suggested growth rate due to additional constraints on growth. Thus, the linear relationship  
296 between growth rates and abundance holds for most growth rates but is likely inaccurate for very  
297 small growth rates. It is important to note that even though abundances are positively correlated  
298 with growth rates within a single individual this is not true across samples where one can observe  
299 a negative correlation for abundant taxa (see Fig. 3A). This is a consequence of the coefficient in  
300 Equation 2, which depends on the actual abundance distribution as well. In particular, the slope  
301 of the linear relationship between abundance and growth rate will be the greatest if all taxa have  
302 equal abundances and take its lowest value when one taxon dominates.

303

304 We observed a wide variation in individual taxon growth rates across samples. Because all of the  
305 community models were constrained under the same diet this phenomenon was due to microbiota  
306 composition only. To explain this variation in individual growth rates, we hypothesized that  
307 different genera might influence each other's growth rate, either by competition or by cooperation.  
308 In order to quantify growth rate interdependencies we performed *in silico* knockouts for each  
309 genus in each sample and tracked the change in growth rates for all remaining genera in the  
310 sample (see Methods). Here we found that the growth rate of each genus was influenced by  
311 another genus in at least one of the 186 samples. As would be expected for bacterial species  
312 competing for the same resources, most interactions were competitive (red edges in Fig. 3B).  
313 However, we observed a distinct subset of bacteria that were interconnected by a network of  
314 cooperative interactions, including *Akkermansia* and *Faecalibacterium* (blue edges in Fig. 3B,  
315 also Fig. S3). Strikingly, genera participating in many interactions across all samples, such as

316 *Bacteroides*, *Eubacterium*, *Akkermansia*, *Alistipes* and *Faecalibacterium*, are known to be  
317 ubiquitous members of the gut microbiome and are often associated with health (6, 36–40). We  
318 found that the prevalence and strength of interactions were highly dependent on the composition  
319 of the microbiome. The vast majority of strong growth interactions were present in only 1-5  
320 samples, whereas all other samples showed very few strong interactions (Fig. S3). This result is  
321 perhaps unsurprising, as many strong species-species interactions are thought to be destabilizing  
322 to ecological communities (41, 42).

323

324 Analysis of exchange fluxes reveals differential use of diet components and  
325 niche partitioning in the microbiota

326

327 One of the major modes of interaction between the gut microbiota and the host is by means of  
328 consumption or production of the metabolite pool in the gut. In our simulations all individuals were  
329 under the same average Western diet (see Methods), which imposes an upper bound for the flux  
330 of metabolites into the gut lumen. However this does not determine *a priori* which components of  
331 the diet are consumed at what rate in each sample, because individual microbiota may consume  
332 less than what is imposed by that maximum diet flux. We quantified this effect by obtaining all  
333 import and export fluxes for each individual genus across all samples (1,613 exchange reactions  
334 in each of 62 genera) as well as metabolite exchanges between the microbiota and the gut lumen  
335 (152 metabolites). This was done in the absence of a metabolic model for enterocytes,  
336 colonocytes or goblet cells due to the lack of a curated metabolic reconstruction and validated  
337 objective function for those cells. A unique set of exchange fluxes was obtained by considering  
338 the set of exchange fluxes with smallest total import flux for the growth rates obtained by the  
339 cooperative trade-off (see Methods). This assumes that the microbiota competes for resources  
340 with the host gut and will thus favor an efficient import that yields the maximum growth rate. This  
341 also corresponds to the particular distribution of import fluxes an individual microbiota is most  
342 adapted to.

343

344 Even though the minimization of total import fluxes favors simpler media compositions, most  
345 samples showed a diverse consumption of metabolites from the gut, particularly in the wide array  
346 of carbon and nitrogen sources (Fig. 4A). There was a large set of metabolites that were  
347 consumed across all samples but we also observed many metabolites with differential import

348 fluxes across individuals. In particular, we observed a bimodal distribution where microbiota either  
349 consumed fibers and starches or branched chain amino acids (see indicated metabolites in Fig.  
350 4A). This bimodal pattern did not correlate with health or disease states. As expected, all  
351 communities showed net anaerobic growth.

352  
353 Given the observed heterogeneity in taxon growth rates and the large number of interactions we  
354 were interested in looking at the uptake rates of metabolites from the gut lumen by each genus.  
355 There was overlap of metabolite usage across genera. On average 32% of the metabolites were  
356 shared between any two genera in any sample (standard deviation of 13%, see Methods).

357

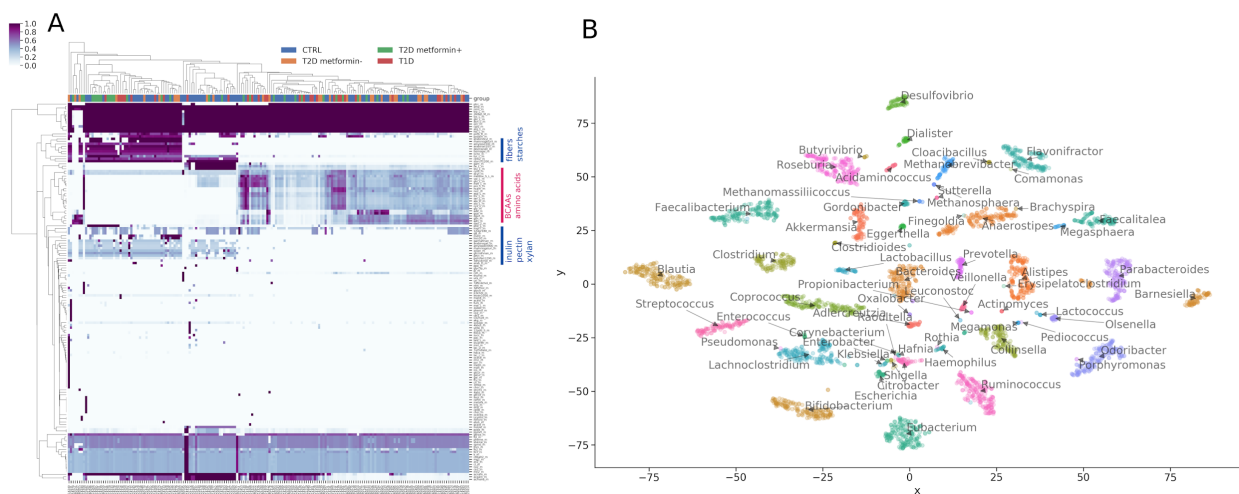

358  
359 Figure 4: Microbiota import fluxes across samples. Exchange fluxes were calculated as the smallest set of  
360 import fluxes that could maintain the genera growth rates obtained by the cooperative trade-off. (A) Import  
361 fluxes across samples. Rows were normalized to their absolute maximum and colors denote the import  
362 rate ranging from 0% to 100% maximum import. Metabolite groups of interest are marked by blue and red  
363 lines (BCAA = branched chain amino acids). Column headers are colored by host metabolic health state  
364 (CTRL = metabolically healthy, T1D = type 1 diabetes, T2D = type 2 diabetes, metformin +/- =  
365 with/without metformin treatment). (B) Growth niche map for gut genera. Import fluxes for each genus in  
366 each sample were reduced to two dimensions using t-SNE. Each point denotes a genus in one sample  
367 and is colored and named by its genus.

368

369  
370 Consequently, more than two thirds of metabolites were used differentially between pairs of  
371 genera. To visualize the structure of metabolite consumption by individual bacterial genera in the  
372 gut we used t-SNE dimensionality reductions on the individual genus-specific import fluxes (43).  
373 This revealed clear genus-specific niche structure across samples, where individual genera could

374 be uniquely identified by their particular set of import fluxes (Fig. 4B). Here, taxa closer to one  
 375 another overlap more in consumed metabolites (Fig. 4B). For instance, *Bacteroides* and  
 376 *Prevotella* were relatively close to each other in the center of the map, which may help explain  
 377 the observed tradeoff between *Bacteroides* and *Prevotella* abundances across humans (44).  
 378 *Blautia*, *Desulfovibrio*, *Bifidobacterium* and *Eubacterium* had the most unique growth niches  
 379 overall. Genus identity alone explained 61% of the variance in import fluxes (Euclidean  
 380 PERMANOVA  $p=0.001$ ). Thus, there was extensive growth niche partitioning between bacterial  
 381 genera.  
 382

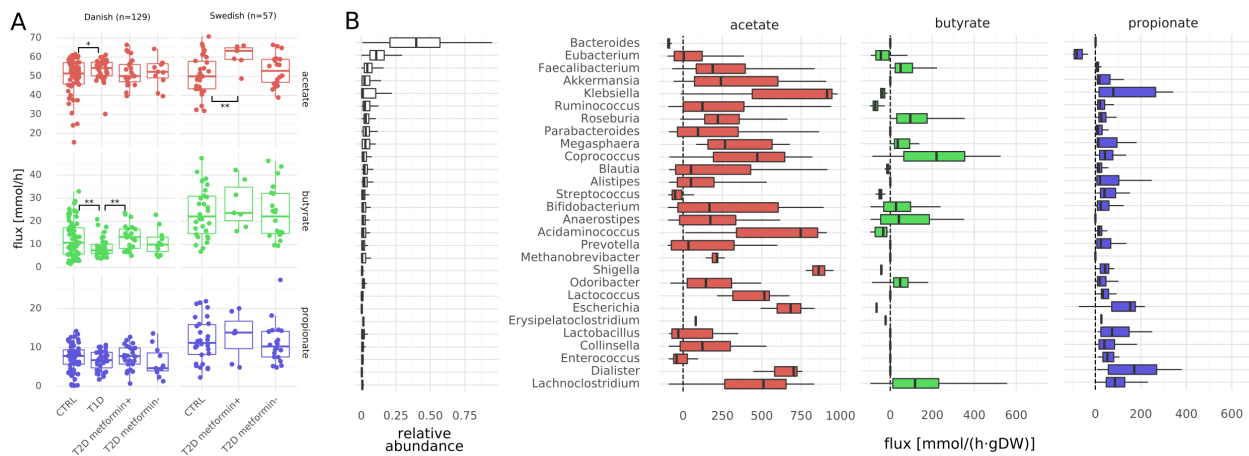

383  
 384 Figure 5: SCFA fluxes. (A) Production capacities of the major SCFAs stratified by population. Fluxes  
 385 denote total amount of SCFA produced by 1g of bacterial biomass in the gut. Stars denote significance  
 386 under Welch's t-test (\*  $p<0.05$ , \*\*  $p<0.01$ ). (B) Genus-specific fluxes for the three major SCFAs. Shown  
 387 are only genera with a relative abundance  $>1\%$ . Fluxes denote total production/consumption for each  
 388 genus (see Methods) and are directed towards exports. Thus, positive fluxes denote production of the  
 389 metabolite and negative fluxes consumption. Genera are ordered by average relative abundance (relative  
 390 abundances shown in the first column) from top to bottom.

391 SCFA production is driven by extensive cross-feeding within the microbiota  
 392 and can be modulated by personalized interventions

393  
 394 Given the association between SCFAs and disease phenotypes we investigated the degree of  
 395 SCFA production by the model microbiota (2, 45, 46). Intestinal cells have access to the full pool  
 396 of SCFAs in the gut lumen and would probably take up a significant fraction of those extracellular  
 397 SCFAs. Thus, the total export flux of any SCFA into the gut lumen by all taxa in a specific model  
 398 is a measure of host-available SCFA production by the microbiota (see Methods for details on



399 computation). Overall SCFA production for the major SCFAs showed large variations even in  
400 healthy individuals, which indicates a large impact of gut microbiota composition on SCFA  
401 availability. In particular we observed that Swedish individuals showed higher SCFA production  
402 rates than the Danish individuals in the study. Butyrate production was diminished by about 2-fold  
403 in Danish individuals with type 1 diabetes (Welch's t-test,  $p=0.004$ ) but not in Swedish individuals.  
404 Danish and Swedish individuals with type 1 diabetes had microbiota that produced more acetate  
405 than healthy individuals (Welch's t-test,  $p=0.02$  and  $0.003$ , respectively; Fig. 5A). Metformin  
406 treatment had a moderate effect in increasing butyrate productions in both cohorts, however this  
407 effect was strongest when comparing Danish individuals with T1D and metformin-treated danish  
408 individuals with T2D (Welch's t-test,  $p=0.003$ ). Higher production of SCFAs was usually  
409 accompanied by an increased consumption of SCFAs within the gut microbiota (Fig. S4). This is  
410 consistent with prior findings in Danish and Chinese populations (4, 27, 47).

411  
412 Decreases in butyrate production were usually accompanied by increases in acetate production.  
413 This appeared to indicate SCFA cross-feeding within the microbiota, which we confirmed by  
414 comparing the total production and consumption fluxes for each bacterial genus across all  
415 samples (Fig. 5B). We observed that butyrate was almost exclusively formed in an acetate-  
416 dependent manner from acetyl-CoA, which is the most prevalent butyrate-production pathway in  
417 bacteria (48). In particular, production of butyrate depended on acetate production in the  
418 community. This was enabled by an extensive cross-feeding between the genera. All SCFAs were  
419 produced by a heterogeneous set of taxa, with acetate and propionate production being spread  
420 out across most taxa in the system and butyrate production being somewhat more restricted to a  
421 smaller set of taxa (Fig. 5B). Across samples, the most efficient butyrate producers were  
422 *Faecalibacterium*, *Coprococcus*, *Roseburia*, *Anaerostipes* and *Lachnoclostridium*, all of which are  
423 known butyrate producers (48, 49). However, the models also predicted consumption of acetate  
424 by *Bacteroides* and consumption of butyrate by *Eubacterium*, which is not commonly observed *in*  
425 *vivo*. Production of SCFAs was complemented by several other genera, generating a network of  
426 SCFA cycling within the microbiota. SCFA production by any genus showed high variation across  
427 samples and in some cases would even switch between consumption and production of a  
428 particular SCFA, which shows how specific SCFA production is to a particular microbial  
429 community (compare Fig 5B). Net production of SCFAs was low compared to overall production  
430 (Fig. 5A and S4B) which indicates that most SCFAs in our models were cycled within the bacterial  
431 community.

432



433 Finally, as a proof of concept for the utility of MICOM, we aimed to quantify the impact of targeted  
434 interventions on the net consumption or production of SCFAs by the microbiota. For this we chose  
435 three Swedish samples (normal, T2D metformin-, T2D metformin+). The impacts of a particular  
436 univariate interventions were then quantified by using elasticity coefficients (50, 51), which are  
437 dimensionless measures of how strongly a parameter affects a given flux (see Methods).  
438 Univariate interventions included increasing the availability of a single metabolite in the diet or  
439 increasing the abundance of a single bacterial genus. We observed that the effect of these single  
440 interventions were very heterogeneous across all 3 samples (see Fig. 6). The strongest and most  
441 common observed effects were to diminish overall SCFA production. However, we observed a  
442 few interventions that were able to weakly increase SCFA production. There was a distinct set of  
443 metabolites that would increase butyrate production in the T2D individuals but not in the healthy  
444 individual. This was also dependent on metformin status. For instance, Arabinan increased  
445 butyrate production in the metformin positive individual and D-Xylose increased butyrate  
446 production in the metformin negative individual, but not *vice versa*. Thus, MICOM is able to  
447 explore the potential functional consequences of targeted dietary or probiotic interventions, which  
448 can differ greatly depending on the context of the microbiota in which the interventions are made.  
449

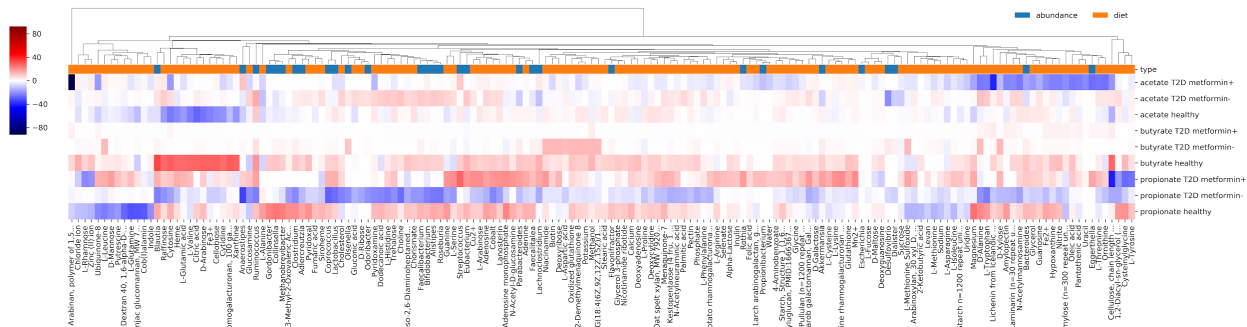

450  
451 Figure 6: Effect of interventions on SCFA production in 3 samples. Each row denotes a SCFA in a specific  
452 individual and each column either denotes a diet component or bacterial genus. Colors denote the elasticity  
453 (i.e. the percent change in SCFA production given a percent increase in the specific effector). Red denotes  
454 interventions that would increase SCFA production and blue interventions that would decrease production.  
455 Shown are only interventions with non-zero elasticities in at least one sample.  
456

## 457 Discussion

458 There is a large amount of sequencing data on microbial communities available today. This is  
459 mostly due to the falling cost of 16S rRNA sequencing or shallow shotgun sequencing (52). There

460 is wide interest in extracting information from sequencing data that goes beyond bacterial  
461 proportions (53). Metabolic modeling incorporates a rich knowledge base from genomics and  
462 biochemistry and is a valuable resource for adding value to existing datasets. Specifically, MICOM  
463 allows for the integration of genome-scale metabolic models, dietary information in the form of  
464 import flux bounds, and abundance data from metagenomic shotgun or marker gene sequencing.  
465 This framework enables *in silico* mechanistic predictions concerning ecological interactions within  
466 microbial communities, inferred exchanges between microbial communities and their  
467 environment, and mechanistic hypotheses for how metabolic interactions can be modulated by  
468 changes in the environment. The design of a reasonable metagenome-scale metabolic models is  
469 challenging due to apparent tradeoffs between individual and community growth rates and issues  
470 with computational tractability. Here, we provided a viable strategy that allows for complex  
471 analysis of the metabolic consequences of variation in microbial community composition. Our  
472 regularization strategy allows for fast identification of unique sets of individual growth rates, which  
473 operate in biologically realistic ranges. Our assumption that there is a tradeoff between community  
474 growth rate and individual taxon growth rates is supported by the observation that most microbial  
475 communities are composed of a large number of species with non-negligible abundances.  
476 Individual growth rates for bacterial genera varied greatly across samples (Fig. 2) and were tightly  
477 coupled to genus abundances within a sample (Fig. 3A). However, there may be other  
478 regularization strategies that provide better agreement with the underlying biology. Our validation  
479 strategy using replication rates obtained directly from metagenomic data provides a simple  
480 framework to test new regularization functions in the future. It seems that the large variation of  
481 growth rates can be explained by a dependency of the growth rate on the presence of other  
482 bacteria in the sample (Fig. 3B). Thus, bacterial growth in the gut microbiota is not only dictated  
483 by abundance but also by taxon-taxon interactions.

484  
485 Our predictions are somewhat limited by a variety of factors. For instance, the lack of metabolic  
486 models for the major cell types of the gut epithelium (especially goblet cells, enterocytes and  
487 colonocytes) and sample-specific metabolite availability in the gut lumen limits the accuracy of  
488 MICOM's predictions. Additionally, the use of representative models for bacterial genera may also  
489 have caveats. Available metabolic reconstructions are often based on laboratory strains that may  
490 not represent the exact metabolic capacity of strains in the human gut. Thus, reconstructions may  
491 lack certain metabolic pathways present in the sample and yield inaccurate results, especially  
492 when not applying appropriate bounds for the underlying diet (33, 54). Model-predictions may  
493 become more quantitative as better personalized data becomes available. The incorporation of

494 personalized data on diet and a better grasp on what fraction of metabolites are absorbed in the  
495 small intestine should help to improve model-based predictions. Personalized reconstruction of  
496 microbial community metabolic models directly from metagenomic sequencing data may provide  
497 more accurate predictions as well, but this approach is currently limited by insufficient sequencing  
498 coverage for low abundance taxa.

499  
500 MICOM provided valuable ecological insights into the gut microbiota. For instance, the  
501 cooperative tradeoff in Equation 2 indicates that a more diverse microbiome (i.e. higher evenness)  
502 results in higher individual growth rates (on average) due to the magnitude scaling of the  
503 abundance vector (denominator in Equation 2). We also found strong niche partitioning in the  
504 model, where taxa showed minimal overlap with each other in resource utilization space. This  
505 minimal overlap implies that there is likely an upper bound on alpha diversity in the gut, due to  
506 the fact that growth niches eventually saturate and limit the number of taxa that can engraft. Even  
507 though only about a third of metabolites were consumed by any pair of taxa in the models, this  
508 small amount of niche overlap still resulted in resource competition between taxa. This was  
509 particularly true for dominant taxa (e.g. *Bacteroides*), which tended to show competitive  
510 interactions with many other genera, likely due to the comparatively higher resource requirements  
511 of these abundant taxa for maintaining growth. This community-wide resource competition fits  
512 well with the observed growth dependency on amino acid import fluxes across all taxa (Fig. 3A),  
513 which is consistent with prior work that suggest that nitrogen may be the global limiting factor for  
514 microbial growth in the gut (55). Finally, the methods here extend to any ecosystem containing  
515 many microbial taxa and is applicable to abundance data summarized at various phylogenetic  
516 ranks. As such MICOM can be employed to perform functional analyses on a wide range of  
517 microbial ecosystems.

518  
519 It has been difficult and time-consuming to obtain empirical evidence for the mechanistic basis of  
520 gut-microbiota interactions. MICOM provides a high-throughput platform for generating  
521 mechanistic hypotheses and running *in silico* experiments that would be impossible to perform *in*  
522 *vivo*. Thus, we feel that the major application for MICOM is to provide detailed functional  
523 hypotheses that can serve as targets for experimental validation. For example, MICOM reveals  
524 widespread SCFA cross-feeding in the gut microbiota. The mere presence of butyrate producers  
525 was not enough for stable SCFA production - acetate production was also required. Furthermore,  
526 MICOM generated personalized predictions for how dietary and probiotic interventions influenced  
527 SCFA production capacity. This basic approach could be extended to any number of clinically-

528 relevant metabolites. Thus, we hope that the method presented here will aid researchers in  
529 leveraging existing gut microbiome data to design and test personalized intervention strategies.  
530

## 531 Methods

### 532 Data availability and reproducibility

533  
534 All data to reproduce the manuscript, intermediate results as well as Python scripts to reproduce  
535 the figures in this manuscript are available in a data repository at  
536 [https://github.com/resendislab/micom\\_study](https://github.com/resendislab/micom_study). Metagenomic reads for the 186 individuals were  
537 obtained from Forslund et. al. (27) and can be downloaded from the Sequence Read Archive  
538 (<https://www.ncbi.nlm.nih.gov/sra>) with the SRA toolkit  
539 (<https://www.ncbi.nlm.nih.gov/sra/docs/toolkitsoft/>). A full list of run accession IDs for the  
540 individual samples is provided in the data repository (“recent.csv”). All algorithms and methods  
541 used here were implemented in a Python package and can be easily applied to different data  
542 sets. The Python package “MICOM” (**M**icrobial **C**OMmunities) along with documentation and  
543 installation instructions are available at <https://github.com/resendislab/micom>. MICOM is based  
544 on the popular COBRAPy Python package for constraint-based modeling of biological networks  
545 and is compatible with its API (56). The cooperative trade-off strategy as described here was  
546 introduced to MICOM in version 0.9.0. The AGORA reference reconstructions with an already  
547 applied average Western diet can be downloaded from <https://vmh.uni.lu/#downloadview>. Several  
548 methods used in MICOM require an interior point solver with capabilities for quadratic  
549 programming problems (QPs) for which there is currently only commercial software available.  
550 MICOM supports CPLEX (<https://cplex.org>) and Gurobi (<https://gurobi.org>) both of which have  
551 free licenses for academic use. Intermediate results that required those solvers are also provided  
552 in the data repository to permit reproduction of our major conclusions.

### 553 Metagenomic shotgun data analysis

554 All metagenomic analyses were performed in R using an in-house pipeline which is available as  
555 an open source package along with documentation at <https://github.com/resendislab/mbtools>.  
556 Sample FASTQ files were downloaded using the SRA toolkit and trimmed and filtered using the  
557 DADA2 “filter\_and\_trim” function (57) with a left trimming of 10 bp, no right trimming, a quality

558 cutoff of 10 and a maximum number of 2 expected errors under the Illumina model. Abundances  
559 across different taxa levels were then obtained using SLIMM (29) which was chosen because it  
560 supported one of the largest references (almost 5,000 reference bacterial genomes). In brief, all  
561 sample FASTQ files were first aligned to the SLIMM reference using Bowtie2 saving the 100 best  
562 matches for each read. Taxa abundance profiles were then obtained using SLIMM with a window  
563 size of 100bps and assembled into a single abundance file. SLIMM coverage profiles resolved to  
564 single strains were then used to infer replication rates using the iRep method (58). In brief,  
565 coverage profiles were first smoothed with a rolling mean over 5kbp windows and only genomes  
566 with at least a mean coverage of 2 and with at least 60% of total length covered were considered.  
567 Coverage values were log-transformed, sorted, and the lowest and highest 10% of the data points  
568 were removed to obtain the linear part of the curve. Replication rates were then inferred from the  
569 slope of a regression on that linear part. An estimate for the minimum coverage was then obtained  
570 from the intercept of the regression and only replication rates for strains with a minimum coverage  
571 >2 were kept. No correction for GC content was performed. Before model construction, genus-  
572 level and species-level quantifications for each sample were matched separately to the AGORA  
573 models by name. The final quantification and mapping is provided in the data repository  
574 (“genera.csv” and “species.csv” at <https://github.com/micom-dev/paper>).

## 575 Strategies used in MICOM

576 Flux balance analysis obtains approximate fluxes for a given organism by assuming a steady  
577 state for all fluxes in the biological system and optimizing an organism-specific biomass reaction.  
578 Using the stoichiometric matrix  $S$  which contains reaction in its columns and metabolites in its  
579 rows this can be formulated as a constrained linear programming problem for the fluxes  $v_i$  (in  
580 mmol/[gDW h]):

$$\begin{aligned} 581 & \\ 582 & \text{maximize } v_{bm} \\ 583 & \text{s.t. } Sv = 0 \\ 584 & lb_i \geq v_i \geq ub_i \\ 585 & \end{aligned}$$

586 The biomass reaction  $v_{bm}$  is usually normalized such that it will produce 1g of biomass which  
587 results in a unit 1/h corresponding to the growth rate  $\mu$  of the organism. The upper and lower  
588 bounds ( $lb_i$  and  $ub_i$ , respectively) impose additional thermodynamic constraints on the fluxes or  
589 restrict exchanges with the environment (in the case of exchange fluxes). In order to describe a  
590 community model containing several organisms each with a particular abundance  $a_i$  (in gDW) one

591 usually embeds each organism in an external compartment which represents the community  
 592 environment (for instance the gut lumen for models of the gut microbiota). Adding exchanges for  
 593 the environment compartment and exchanges between a particular organism and the  
 594 environment one obtains a community model with the following constraints:

$$\begin{aligned}
 595 \quad & \text{maximize } \mu_c = \sum_i a_i \cdot \mu_i \\
 & \text{s. t. } \forall i: Sv = 0 \\
 597 \quad & \mu_i = v_i^{bm} \geq \mu_i^{\min} \\
 598 \quad & lb_i \geq v_i \geq ub_i \\
 599 \quad & lb_i^{ex} \geq a_i \cdot v_i^{ex} \geq ub_i^{ex} \\
 600 \quad & lb_i^m \geq v_i^m \geq ub_i^m
 \end{aligned}$$

601 Here,  $a_i$  denotes the relative abundance of genus  $i$ ,  $\mu_i$  its growth rate,  $v_i^{bm}$  its biomass flux,  $\mu_i^{\min}$  a  
 602 user specified minimum growth rate,  $v_i^{ex}$  the exchange fluxes with the external environment, and  
 603  $lb$  and  $ub$  the respective lower and upper bounds. Additionally,  $\mu_c$  denotes the community growth  
 604 rate and  $v_i^m$  the exchanges between the entire community and the gut lumen. The described  
 605 constraints are identical to the ones employed in SteadyCom (22, 29). We assigned an upper  
 606 bound of 100 mmol/[gDW h] for the internal exchange fluxes  $v_i^{ex}$ . Assuming a total microbiota  
 607 biomass of 200 g and a representative bacterial cell dry weight of 2 pg (59), this corresponds to  
 608 a maximum import or export of more than 100,000 molecules/[cell s]. Diet derived lower bounds  
 609 with values smaller  $10^{-6}$  mmol/[gDW h] were set to zero as they would have been lower than the  
 610 numerical tolerance of the solver. Taxa with relative abundances  $a_i$  smaller  $10^{-3}$  for the genus  
 611 models or  $10^{-4}$  for the species models were discarded since they would not be able to affect the  
 612 external metabolite levels in a significant way but do increase computation time. Internal fluxes  $v_i$   
 613 received respective bounds of 1000.0 (or 0 if irreversible) making them essentially unbounded.  
 614 The described constraints are applied to all optimization problems in MICOM and will be further  
 615 called the “community constraints”.

616  
 617 The cooperative trade-off method consists of two sequential problems. First, maximize the  
 618 community growth rate  $\mu_c$  to obtain  $\mu_c^{\max}$ . Using a user specified trade-off  $\alpha$  now solve the following  
 619 quadratic minimization problem:

$$\begin{aligned}
 620 \quad & \text{minimize } \sum_i \mu_i^2 \\
 621 \quad & \text{s. t. } \mu_c \geq \alpha \cdot \mu_c^{\max}
 \end{aligned}$$



622 *and community constraints*

623

624 The knockout for a genus  $i$  was performed by setting all fluxes belonging to this genus along with  
625 its exchanges with the external environment to zero ( $lb=0$  and  $ub=0$ ). This is followed by running  
626 cooperative trade-off on the knockout model and comparing the growth rates after the knockout  
627 with the ones without the knockout.

628

## 629 Solvers and Numerical stabilization

630 Most genome-scale metabolic models usually do not treat more than 10,000 variables in the  
631 corresponding linear or quadratic programming problems. However, in microbial community  
632 models we usually treat 10s to 100s of distinct genome-scale models, which makes the  
633 corresponding problem much larger. Unfortunately, many open and commercial solvers have  
634 difficulties solving problems of that scale, so we also implemented strategies to increase the  
635 success rate of those optimizations. All linear and quadratic programming problems were solved  
636 using interior point methods as those were much faster than simplex methods for problems with  
637 more than 100,000 variables. Here, we used CPLEX (<https://www.ibm.com/analytics/cplex-optimizer>)  
638 but also tested all methods with Gurobi (<https://www.gurobi.com>). Since growth rates  
639 tend to be small we also multiplied the objectives used in the cooperative tradeoff (maximization  
640 of community growth rate and minimization of regularization term) with a scaling factor in order to  
641 avoid near-zero objective coefficients. A scaling factor in the order of the largest constraint  
642 (1000.0) seemed to work well. Nevertheless, the default interior point methods for quadratic  
643 problems in CPLEX or Gurobi were usually not capable of solving the minimization of the  
644 regularization term to optimality and usually failed due to numerical instability. The solutions  
645 reported by the aborted optimization run were usually close to the optimum, but tended to violate  
646 some numerically ill-conditioned constraints. To alleviate this problem, we implemented a  
647 crossover strategy where we took the solution of the numerically ill-conditioned quadratic interior  
648 point method as a candidate solution set  $\mu_i^{ca}$ . Based on that we then optimized the following linear  
649 programming problem in order to restore feasibility:

650

$$\text{maximize } \mu_c = \sum_i a_i \cdot \mu_i$$

651

$$s. t. \mu_i \leq \mu_i^{ca}$$

652 *and community constraints*



653 Linear interior point methods are usually numerically stable so this linear programming problem  
654 can usually be solved to optimality. The maximization together with the new constraints will push  
655 the individual growth rates towards the candidate solution as long as it is numerically feasible.

## 656 Minimal media and exchange fluxes

657 By convention MICOM formulates all exchange fluxes in the export direction so that all import  
658 fluxes are positive and export fluxes are negative. Based on this, the minimal medium for a  
659 community was obtained by minimizing the total import flux:

$$660 \quad \text{minimize } v_{tot} = \sum_i \{|v_i^m|, v_i^m < 0\}$$

$$661 \quad \text{s. t. } \forall i: \mu_i \geq \mu_i^{ct}$$

$$662 \quad \mu_c \geq \alpha \cdot \mu_c^{max}$$

663 *and community constraints*

664 Here  $\mu_i^{ct}$  denotes the optimal genera growth rates obtained by cooperative trade-off. The  
665 community exchanges were then obtained by extracting all  $v_i^m$ , whereas genus-specific  
666 exchanges were given by all  $v_i^{ex}$  as defined earlier.

667  
668 Overall production fluxes were calculated as

$$669 \quad v_{tot}^m = \sum_{i, v_i^m > 0} a_i \cdot v_i^m,$$

670 where  $v_i^m$  denotes an exchange flux for the metabolite  $m$  in taxon  $i$ . Overall consumption rates  
671 were calculated in a similar manner but restricting fluxes to ones with  $v_i^m < 0$  (imports).

672

## 673 Single target intervention studies

674 We used elasticity coefficients (50, 51) to evaluate the sensitivity of exchange fluxes to changes  
675 in exchange flux bounds (*ergo* diet changes) or changes in genus abundances. The logarithmic  
676 formulation of elasticity coefficients is given by

677

$$678 \quad \varepsilon_p^v = \frac{\partial \ln |v|}{\partial \ln |p|}$$

679

680 where  $v$  denotes the exchange flux of interest and  $p$  the changed parameter. Since the absolute  
681 value removes information about the directionality of the flux this was logged separately to

682 maintain this information. We used a value of 0.1 as differentiation step size in log space, which  
683 corresponds to a bound or abundance increase of about 10.5% in the native scale. To enable  
684 efficient computation, elasticity coefficients were grouped by the  $p$  parameter, then the  
685 cooperative trade-off was run once without modification, the  $p$  parameter was increased, the  
686 cooperative trade-off was run again, and differentiation was performed for all exchange fluxes at  
687 once.

688  
689

## 690 Acknowledgements

691  
692 ORA and CD were supported by an internal grant from the National Institute of Genomic Medicine  
693 (INMEGEN/México). SMG and CD were supported by a Washington Research Foundation  
694 Distinguished Investigator Award and startup funds from the Institute for Systems Biology.

## 695 Author contributions

696 CD developed/implemented the methods and performed the analysis. SMG helped design the  
697 metagenomic analyses and growth rate validations. ORA developed the methods and designed  
698 the meta-analysis. All authors wrote the manuscript.

## 699 Supplementary Material

700  
701 **Supplementary Text S1.** Closed form solutions for regularization.

702  
703 Additional materials and data are available at [https://github.com/micom-dev/micom\\_study](https://github.com/micom-dev/micom_study).

704 Supplemental Figures

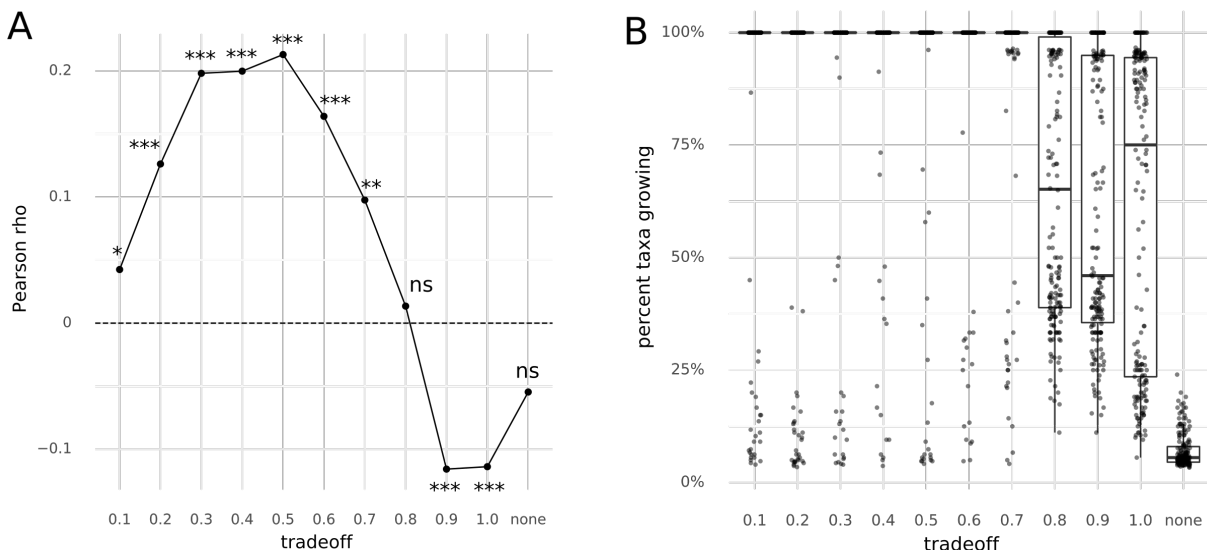

705  
 706 Figure S1. (A) Pearson correlations between inferred growth rates and replication rates across all  
 707 samples (n=1,062). Stars denote significance of a Pearson test (ns -  $p > 0.05$ , \* -  $p < 0.05$ , \*\* -  $p < 0.01$ , \*\*\* -  
 708  $p < 0.001$ ). The dashed line denotes a zero correlation coefficient. (B) Fraction of observed genera growing  
 709 in each sample. Each dot denotes a single sample. A trade-off of “none” means optimization without L2  
 710 regularization and only maximizing the community growth rate.  
 711

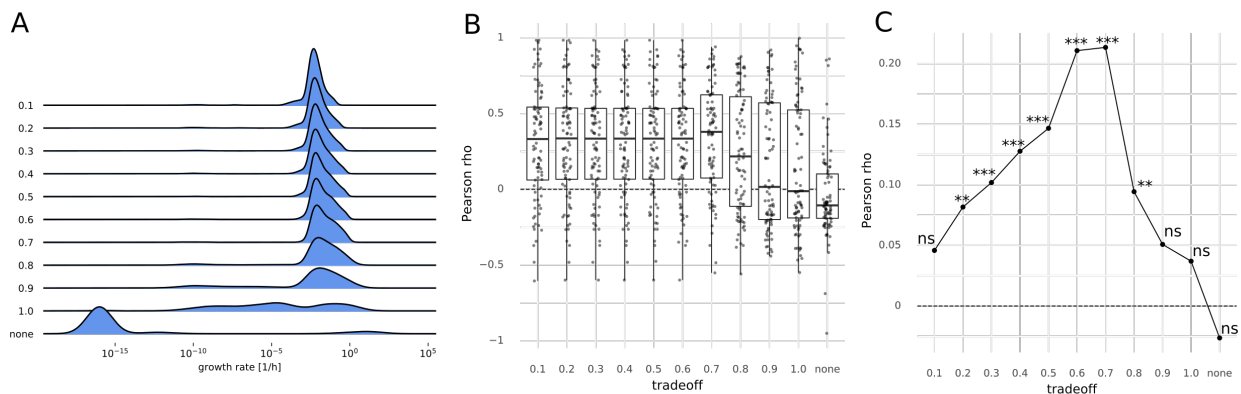

712  
 713 Figure S2. Metrics on the species level. (A) Effect of different trade-off values (fraction of maximum  
 714 community growth rate) on the distribution of individual species growth rates. Zero growth rates were  
 715 assigned a value of  $10^{-16}$  which was smaller than the observed non-zero minimum. Growth rates smaller  
 716 than  $10^{-6}$  were considered to not represent growth. (B) Pearson correlation between replication rates and  
 717 inferred species growth rates under varying trade-off values. “None” indicates a model without  
 718 regularization returning arbitrary alternative solutions (see Methods). The dashed line indicates a  
 719 correlation coefficient of zero. (C) Pearson correlations between inferred species growth rates and

720 replication rates across all samples (n=1,113). Stars denote significance of a Pearson test (ns -  $p > 0.05$ , \*  
721 -  $p < 0.05$ , \*\* -  $p < 0.01$ , \*\*\* -  $p < 0.001$ ). The dashed lines denotes a zero correlation coefficient.  
722

723

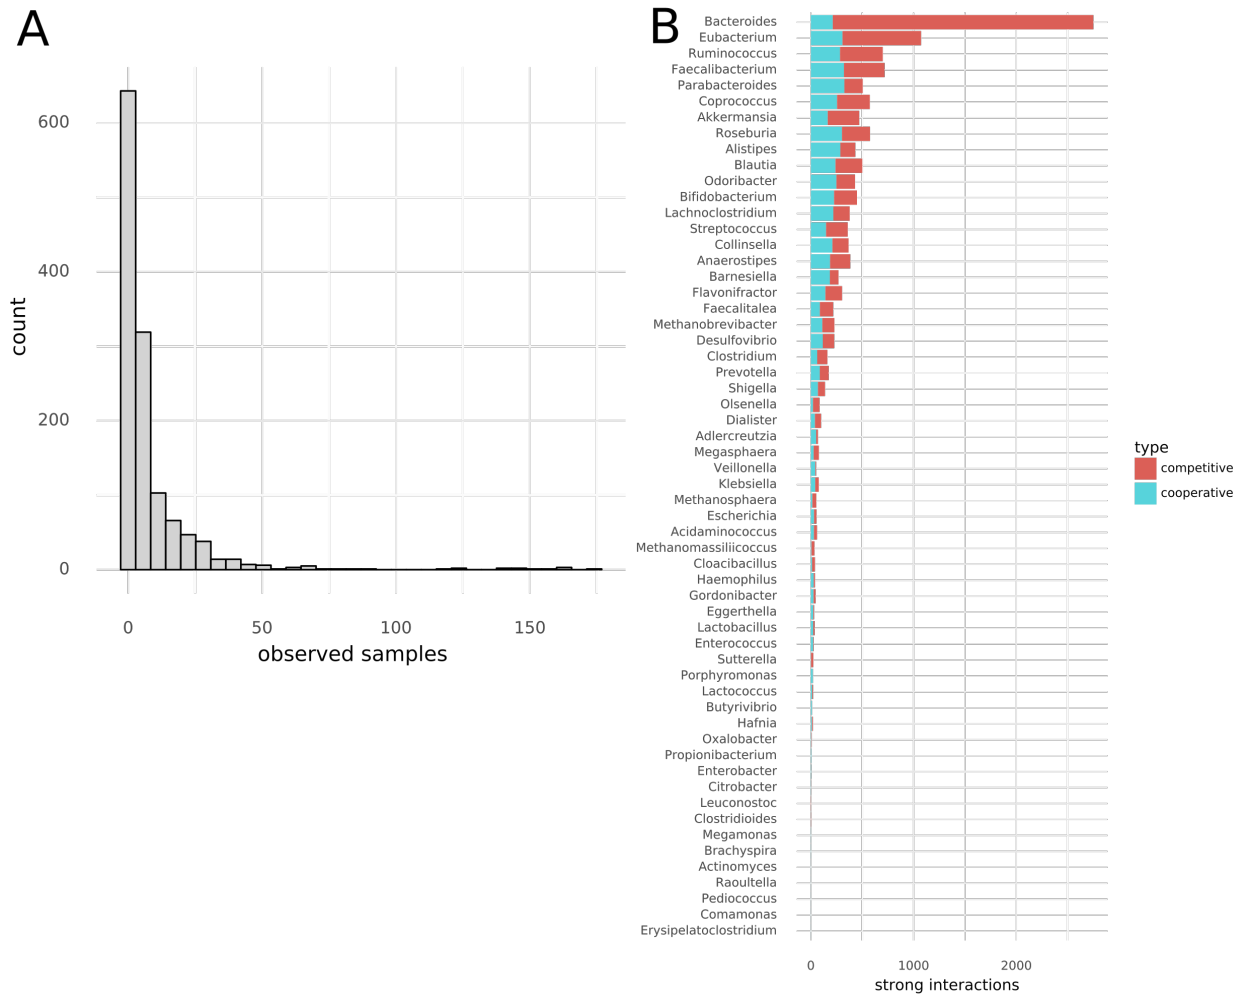

724

725

726 Figure S3. Strong interactions are heterogeneously distributed across samples. (A) Histogram of the  
727 number of samples a particular interaction occurs in. Lower numbers on the x-axis denote sample-specific  
728 interactions and higher numbers denote ubiquitous interactions. (B) Interactions observed across all  
729 samples stratified by genus and type.

730

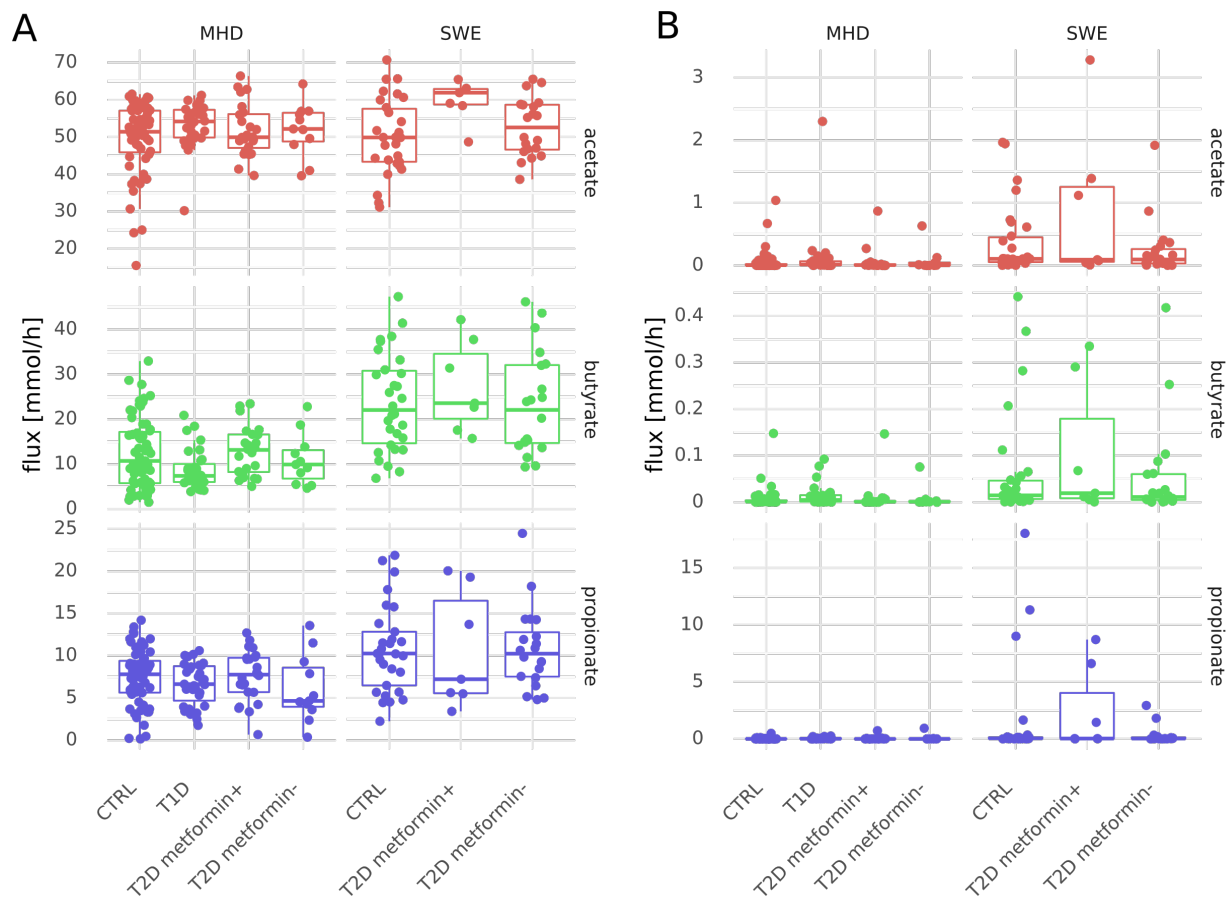

731

732 Figure S4. Total consumption and net flux of SCFAs by the microbiota. (A) Total consumption flux of

733 SCFAs. (B) Net production of SCFAs (i.e. difference of total production and total consumption).

734

## 735 References

- 736 1. Zeevi D, Korem T, Zmora N, Israeli D, Rothschild D, Weinberger A, Ben-Yacov O, Lador D,  
737 Avnit-Sagi T, Lotan-Pompan M, Suez J, Mahdi JA, Matot E, Malka G, Kosower N, Rein M,  
738 Zilberman-Schapira G, Dohnalová L, Pevsner-Fischer M, Bikovsky R, Halpern Z, Elinav E,  
739 Segal E. 2015. Personalized Nutrition by Prediction of Glycemic Responses. *Cell*  
740 163:1079–1094.
- 741 2. Cho I, Blaser MJ. 2012. The human microbiome: at the interface of health and disease. *Nat*  
742 *Rev Genet* 13:260–270.
- 743 3. Lewis JD, Chen EZ, Baldassano RN, Otley AR, Griffiths AM, Lee D, Bittinger K, Bailey A,  
744 Friedman ES, Hoffmann C, Albenberg L, Sinha R, Compher C, Gilroy E, Nessel L, Grant A,  
745 Chehoud C, Li H, Wu GD, Bushman FD. 2015. Inflammation, Antibiotics, and Diet as  
746 Environmental Stressors of the Gut Microbiome in Pediatric Crohn’s Disease. *Cell Host*  
747 *Microbe* 18:489–500.
- 748 4. Qin J, Li Y, Cai Z, Li S, Zhu J, Zhang F, Liang S, Zhang W, Guan Y, Shen D, Peng Y,  
749 Zhang D, Jie Z, Wu W, Qin Y, Xue W, Li J, Han L, Lu D, Wu P, Dai Y, Sun X, Li Z, Tang A,  
750 Zhong S, Li X, Chen W, Xu R, Wang M, Feng Q, Gong M, Yu J, Zhang Y, Zhang M,  
751 Hansen T, Sanchez G, Raes J, Falony G, Okuda S, Almeida M, LeChatelier E, Renault P,  
752 Pons N, Batto J-M, Zhang Z, Chen H, Yang R, Zheng W, Li S, Yang H, Wang J, Ehrlich SD,  
753 Nielsen R, Pedersen O, Kristiansen K, Wang J. 2012. A metagenome-wide association  
754 study of gut microbiota in type 2 diabetes. *Nature* 490:55–60.
- 755 5. Livanos AE, Greiner TU, Vangay P, Pathmasiri W, Stewart D, McRitchie S, Li H, Chung J,  
756 Sohn J, Kim S, Gao Z, Barber C, Kim J, Ng S, Rogers AB, Sumner S, Zhang X-S, Cadwell  
757 K, Knights D, Alekseyenko A, Bäckhed F, Blaser MJ. 2016. Antibiotic-mediated gut  
758 microbiome perturbation accelerates development of type 1 diabetes in mice. *Nat Microbiol*  
759 1:16140.
- 760 6. Duvallat C, Gibbons SM, Gurry T, Irizarry RA, Alm EJ. 2017. Meta-analysis of gut  
761 microbiome studies identifies disease-specific and shared responses. *Nat Commun* 8:1784.
- 762 7. Xu Z, Malmer D, Langille MGI, Way SF, Knight R. 2014. Which is more important for  
763 classifying microbial communities: who’s there or what they can do? *ISME J* 8:2357–2359.



- 764 8. Langille MGI, Zaneveld J, Caporaso JG, McDonald D, Knights D, Reyes JA, Clemente JC,  
765 Burkepille DE, Vega Thurber RL, Knight R, Beiko RG, Huttenhower C. 2013. Predictive  
766 functional profiling of microbial communities using 16S rRNA marker gene sequences. *Nat*  
767 *Biotechnol* 31:814–821.
- 768 9. Aßhauer KP, Wemheuer B, Daniel R, Meinicke P. 2015. Tax4Fun: predicting functional  
769 profiles from metagenomic 16S rRNA data. *Bioinformatics* 31:2882–2884.
- 770 10. Bauer E, Thiele I. 2018. From Network Analysis to Functional Metabolic Modeling of the  
771 Human Gut Microbiota. *mSystems* 3.
- 772 11. Heinken A, Sahoo S, Fleming RMT, Thiele I. 2013. Systems-level characterization of a  
773 host-microbe metabolic symbiosis in the mammalian gut. *Gut Microbes* 4:28–40.
- 774 12. Resendis-Antonio O, Reed JL, Encarnación S, Collado-Vides J, Palsson BØ. 2007.  
775 Metabolic reconstruction and modeling of nitrogen fixation in *Rhizobium etli*. *PLoS Comput*  
776 *Biol* 3:1887–1895.
- 777 13. Orth JD, Thiele I, Palsson BØ. 2010. What is flux balance analysis? *Nat Biotechnol* 28:245–  
778 248.
- 779 14. Lewis NE, Hixson KK, Conrad TM, Lerman JA, Charusanti P, Polpitiya AD, Adkins JN,  
780 Schramm G, Purvine SO, Lopez-Ferrer D, Weitz KK, Eils R, König R, Smith RD, Palsson  
781 BØ. 2010. Omic data from evolved *E. coli* are consistent with computed optimal growth  
782 from genome-scale models. *Mol Syst Biol* 6:390.
- 783 15. Medlock GL, Carey MA, McDuffie DG, Mundy MB, Giallourou N, Swann JR, Kolling GL,  
784 Papin JA. 2018. Inferring Metabolic Mechanisms of Interaction within a Defined Gut  
785 Microbiota. *Cell Systems* 7:245–257.e7.
- 786 16. Long MR, Ong WK, Reed JL. 2015. Computational methods in metabolic engineering for  
787 strain design. *Curr Opin Biotechnol* 34:135–141.
- 788 17. Zomorodi AR, Maranas CD. 2012. OptCom: a multi-level optimization framework for the  
789 metabolic modeling and analysis of microbial communities. *PLoS Comput Biol* 8:e1002363.
- 790 18. Thompson LR, Sanders JG, McDonald D, Amir A, Ladau J, Locey KJ, Prill RJ, Tripathi A,  
791 Gibbons SM, Ackermann G, Navas-Molina JA, Janssen S, Kopylova E, Vázquez-Baeza Y,

- 792 González A, Morton JT, Mirarab S, Zech Xu Z, Jiang L, Haroon MF, Kanbar J, Zhu Q, Jin  
793 Song S, Kosciolk T, Bokulich NA, Lefler J, Brislawn CJ, Humphrey G, Owens SM,  
794 Hampton-Marcell J, Berg-Lyons D, McKenzie V, Fierer N, Fuhrman JA, Clauset A, Stevens  
795 RL, Shade A, Pollard KS, Goodwin KD, Jansson JK, Gilbert JA, Knight R, Earth  
796 Microbiome Project Consortium. 2017. A communal catalogue reveals Earth's multiscale  
797 microbial diversity. *Nature* 551:457–463.
- 798 19. Gibbons SM, Kearney SM, Smillie CS, Alm EJ. 2017. Two dynamic regimes in the human  
799 gut microbiome. *PLoS Comput Biol* 13:e1005364.
- 800 20. Johnson AJ, Vangay P, Al-Ghalith GA, Hillmann BM, Ward TL, Shields-Cutler RR, Kim AD,  
801 Shmagel AK, Syed AN, Personalized Microbiome Class Students, Walter J, Menon R,  
802 Koecher K, Knights D. 2019. Daily Sampling Reveals Personalized Diet-Microbiome  
803 Associations in Humans. *Cell Host Microbe* 25:789–802.e5.
- 804 21. Poyet M, Groussin M, Gibbons SM, Avila-Pacheco J, Jiang X, Kearney SM, Perrotta AR,  
805 Berdy B, Zhao S, Lieberman TD, Swanson PK, Smith M, Roesemann S, Alexander JE,  
806 Rich SA, Livny J, Vlamakis H, Clish C, Bullock K, Deik A, Scott J, Pierce KA, Xavier RJ,  
807 Alm EJ. 2019. A library of human gut bacterial isolates paired with longitudinal multiomics  
808 data enables mechanistic microbiome research. *Nat Med* 25:1442–1452.
- 809 22. Chan SHJ, Simons MN, Maranas CD. 2017. SteadyCom: Predicting microbial abundances  
810 while ensuring community stability. *PLoS Comput Biol* 13:e1005539.
- 811 23. The Human Microbiome Project Consortium. 2012. Structure, function and diversity of the  
812 healthy human microbiome. *Nature* 486:207–214.
- 813 24. Engl HW, Hanke M, Neubauer A. 2000. *Regularization of Inverse Problems*. Springer  
814 Science & Business Media.
- 815 25. Hoerl AE, Kennard RW. 1970. Ridge Regression: Biased Estimation for Nonorthogonal  
816 Problems. *Technometrics* 12:55–67.
- 817 26. Potra FA, Wright SJ. 2000. Interior-point methods. *J Comput Appl Math* 124:281–302.
- 818 27. Forslund K, Hildebrand F, Nielsen T, Falony G, Le Chatelier E, Sunagawa S, Prifti E,  
819 Vieira-Silva S, Gudmundsdottir V, Pedersen HK, Arumugam M, Kristiansen K, Voigt AY,  
820 Vestergaard H, Hercog R, Costea PI, Kultima JR, Li J, Jørgensen T, Levenez F, Dore J,

- 821 MetaHIT consortium, Nielsen HB, Brunak S, Raes J, Hansen T, Wang J, Ehrlich SD, Bork  
822 P, Pedersen O. 2015. Disentangling type 2 diabetes and metformin treatment signatures in  
823 the human gut microbiota. *Nature* 528:262–266.
- 824 28. Wu H, Esteve E, Tremaroli V, Khan MT, Caesar R, Mannerås-Holm L, Ståhlman M, Olsson  
825 LM, Serino M, Planas-Fèlix M, Xifra G, Mercader JM, Torrents D, Burcelin R, Ricart W,  
826 Perkins R, Fernández-Real JM, Bäckhed F. 2017. Metformin alters the gut microbiome of  
827 individuals with treatment-naive type 2 diabetes, contributing to the therapeutic effects of  
828 the drug. *Nat Med* 23:850–858.
- 829 29. Dadi TH, Renard BY, Wieler LH, Semmler T, Reinert K. 2017. SLIMM: species level  
830 identification of microorganisms from metagenomes. *PeerJ* 5:e3138.
- 831 30. Korem T, Zeevi D, Suez J, Weinberger A, Avnit-Sagi T, Pompan-Lotan M, Matot E, Jona G,  
832 Harmelin A, Cohen N, Sirota-Madi A, Thaïss CA, Pevsner-Fischer M, Sorek R, Xavier R,  
833 Elinav E, Segal E. 2015. Growth dynamics of gut microbiota in health and disease inferred  
834 from single metagenomic samples. *Science* 349:1101–1106.
- 835 31. Magnúsdóttir S, Heinken A, Kutt L, Ravcheev DA, Bauer E, Noronha A, Greenhalgh K,  
836 Jäger C, Baginska J, Wilmes P, Fleming RMT, Thiele I. 2017. Generation of genome-scale  
837 metabolic reconstructions for 773 members of the human gut microbiota. *Nat Biotechnol*  
838 35:81–89.
- 839 32. Noronha A, Modamio J, Jarosz Y, Guerard E, Sompairac N, Preciat G, Daníelsdóttir AD,  
840 Krecke M, Merten D, Haraldsdóttir HS, Heinken A, Heirendt L, Magnúsdóttir S, Ravcheev  
841 DA, Sahoo S, Gawron P, Friscioni L, Garcia B, Prendergast M, Puente A, Rodrigues M,  
842 Roy A, Rouquaya M, Wiltgen L, Žagare A, John E, Krueger M, Kuperstein I, Zinovyev A,  
843 Schneider R, Fleming RMT, Thiele I. 2019. The Virtual Metabolic Human database:  
844 integrating human and gut microbiome metabolism with nutrition and disease. *Nucleic*  
845 *Acids Res* 47:D614–D624.
- 846 33. Magnúsdóttir S, Heinken A, Fleming RMT, Thiele I. 2018. Reply to “Challenges in modeling  
847 the human gut microbiome.” *Nat Biotechnol*.
- 848 34. Lagier J-C, Million M, Hugon P, Armougom F, Raoult D. 2012. Human gut microbiota:  
849 repertoire and variations. *Front Cell Infect Microbiol* 2:136.

- 850 35. Koren O, Goodrich JK, Cullender TC, Spor A, Laitinen K, Bäckhed HK, Gonzalez A, Werner  
851 JJ, Angenent LT, Knight R, Bäckhed F, Isolauri E, Salminen S, Ley RE. 2012. Host  
852 remodeling of the gut microbiome and metabolic changes during pregnancy. *Cell* 150:470–  
853 480.
- 854 36. Morgan XC, Tickle TL, Sokol H, Gevers D, Devaney KL, Ward DV, Reyes JA, Shah SA,  
855 LeLeiko N, Snapper SB, Bousvaros A, Korzenik J, Sands BE, Xavier RJ, Huttenhower C.  
856 2012. Dysfunction of the intestinal microbiome in inflammatory bowel disease and  
857 treatment. *Genome Biol* 13:R79.
- 858 37. Brown K, DeCoffe D, Molcan E, Gibson DL. 2012. Diet-induced dysbiosis of the intestinal  
859 microbiota and the effects on immunity and disease. *Nutrients* 4:1095–1119.
- 860 38. Bajaj JS, Hylemon PB, Ridlon JM, Heuman DM, Daita K, White MB, Monteith P, Noble NA,  
861 Sikaroodi M, Gillevet PM. 2012. Colonic mucosal microbiome differs from stool microbiome  
862 in cirrhosis and hepatic encephalopathy and is linked to cognition and inflammation. *Am J*  
863 *Physiol Gastrointest Liver Physiol* 303:G675–85.
- 864 39. Chen W, Liu F, Ling Z, Tong X, Xiang C. 2012. Human intestinal lumen and mucosa-  
865 associated microbiota in patients with colorectal cancer. *PLoS One* 7:e39743.
- 866 40. Murri M, Leiva I, Gomez-Zumaquero JM, Tinahones FJ, Cardona F, Soriguer F, Queipo-  
867 Ortuño MI. 2013. Gut microbiota in children with type 1 diabetes differs from that in healthy  
868 children: a case-control study. *BMC Med* 11:46.
- 869 41. McCann KS. 2000. The diversity–stability debate. *Nature*.
- 870 42. Coyte KZ, Schluter J, Foster KR. 2015. The ecology of the microbiome: Networks,  
871 competition, and stability. *Science* 350:663–666.
- 872 43. Mahfouz A, van de Giessen M, van der Maaten L, Huisman S, Reinders M, Hawrylycz MJ,  
873 Lelieveldt BPF. 2015. Visualizing the spatial gene expression organization in the brain  
874 through non-linear similarity embeddings. *Methods* 73:79–89.
- 875 44. Arumugam M, Raes J, Pelletier E, Le Paslier D, Yamada T, Mende DR, Fernandes GR,  
876 Tap J, Bruls T, Batto J-M, Bertalan M, Borruel N, Casellas F, Fernandez L, Gautier L,  
877 Hansen T, Hattori M, Hayashi T, Kleerebezem M, Kurokawa K, Leclerc M, Levenez F,  
878 Manichanh C, Nielsen HB, Nielsen T, Pons N, Poulain J, Qin J, Sicheritz-Ponten T, Tims S,

- 879 Torrents D, Ugarte E, Zoetendal EG, Wang J, Guarner F, Pedersen O, de Vos WM, Brunak  
880 S, Doré J, MetaHIT Consortium, Antolín M, Artiguenave F, Blottiere HM, Almeida M,  
881 Brechot C, Cara C, Chervaux C, Cultrone A, Delorme C, Denariáz G, Dervyn R, Foerstner  
882 KU, Friss C, van de Guchte M, Guedon E, Haimet F, Huber W, van Hylckama-Vlieg J,  
883 Jamet A, Juste C, Kaci G, Knol J, Lakhdari O, Layec S, Le Roux K, Maguin E, Mérieux A,  
884 Melo Minardi R, M'rini C, Muller J, Oozeer R, Parkhill J, Renault P, Rescigno M, Sanchez  
885 N, Sunagawa S, Torrejon A, Turner K, Vandemeulebrouck G, Varela E, Winogradsky Y,  
886 Zeller G, Weissenbach J, Ehrlich SD, Bork P. 2011. Enterotypes of the human gut  
887 microbiome. *Nature* 473:174–180.
- 888 45. Kinross JM, Darzi AW, Nicholson JK. 2011. Gut microbiome-host interactions in health and  
889 disease. *Genome Med* 3:14.
- 890 46. Tan J, McKenzie C, Potamitis M, Thorburn AN, Mackay CR, Macia L. 2014. The role of  
891 short-chain fatty acids in health and disease. *Adv Immunol* 121:91–119.
- 892 47. Tremaroli V, Bäckhed F. 2012. Functional interactions between the gut microbiota and host  
893 metabolism. *Nature* 489:242–249.
- 894 48. Vital M, Karch A, Pieper DH. 2017. Colonic Butyrate-Producing Communities in Humans:  
895 an Overview Using Omics Data. *mSystems* 2.
- 896 49. Baxter NT, Schmidt AW, Venkataraman A, Kim KS, Waldron C, Schmidt TM. 2019.  
897 Dynamics of Human Gut Microbiota and Short-Chain Fatty Acids in Response to Dietary  
898 Interventions with Three Fermentable Fibers. *MBio* 10:e02566–18.
- 899 50. Savageau MA. 2010. *Biochemical Systems Analysis: A Study of Function and Design in*  
900 *Molecular Biology*. CreateSpace.
- 901 51. Heinrich R, Rapoport TA. 1974. A Linear Steady-State Treatment of Enzymatic Chains.  
902 General Properties, Control and Effector Strength. *Eur J Biochem* 42:89–95.
- 903 52. Hillmann B, Al-Ghalith GA, Shields-Cutler R, Zhu Q, Gohl D, Beckman KB, Knight R,  
904 Knights D. 2018. Evaluating the information content of shallow shotgun metagenomics.
- 905 53. Gilbert JA, Blaser MJ, Gregory Caporaso J, Jansson JK, Lynch SV, Knight R. 2018.  
906 Current understanding of the human microbiome. *Nat Med* 24:392–400.

- 907 54. Babaei P, Shoaie S, Ji B, Nielsen J. 2018. Challenges in modeling the human gut  
908 microbiome. *Nat Biotechnol* 36:682–686.
- 909 55. Reese AT, Pereira FC, Schintlmeister A, Berry D, Wagner M, Hale LP, Wu A, Jiang S,  
910 Durand HK, Zhou X, Premont RT, Diehl AM, O’Connell TM, Alberts SC, Kartzinel TR,  
911 Pringle RM, Dunn RR, Wright JP, David LA. 2018. Microbial nitrogen limitation in the  
912 mammalian large intestine. *Nat Microbiol* 3:1441–1450.
- 913 56. Ebrahim A, Lerman JA, Palsson BO, Hyduke DR. 2013. COBRApy: COstraints-Based  
914 Reconstruction and Analysis for Python. *BMC Syst Biol* 7:74.
- 915 57. Callahan BJ, McMurdie PJ, Rosen MJ, Han AW, Johnson AJA, Holmes SP. 2016. DADA2:  
916 High-resolution sample inference from Illumina amplicon data. *Nat Methods* 13:581–583.
- 917 58. Brown CT, Olm MR, Thomas BC, Banfield JF. 2016. Measurement of bacterial replication  
918 rates in microbial communities. *Nat Biotechnol* 34:1256–1263.
- 919 59. Sender R, Fuchs S, Milo R. 2016. Revised Estimates for the Number of Human and  
920 Bacteria Cells in the Body. *PLoS Biol* 14:e1002533.
- 921
